# Supplementary material for: Ultra-high piezoelectric properties and labyrinthine-domain structure in (K,Na)(Ta,Nb)O3 with phase boundaries
Source: Royal Society of Chemistry journal article supplement (doi:10.1039/d2ce01125e), 2022-01-01

## Supplementary

### Ultra-high piezoelectric properties and labyrinthine-domain structure in (K, Na)(Ta, Nb)O<sub>3</sub> with phase boundary

Xiangda Meng<sup>1, 2</sup>, Xiaolin Huang<sup>1</sup>, Bohan Xing<sup>1</sup>, Xuejie Sun<sup>1</sup>, Mingxuan Liu<sup>1</sup>, Hao Tian<sup>1, 3, 4</sup> \*

<sup>1</sup>*School of Physics, Harbin Institute of Technology, Harbin 150001, China.*

<sup>2</sup>*Heilongjiang Provincial Key Laboratory of Plasma Physics and Application Technology, Harbin 150001, China.*

<sup>3</sup>*Key Laboratory of Micro-Nano Optoelectronic Information System, Ministry of Industry and Information Technology, Harbin 150001, China.*

<sup>4</sup>*Collaborative Innovation Center of Extreme Optics, Shanxi University, Taiyuan, Shanxi 030006, China.*

**Figure S1.** (a) (b) (c) The height, amplitude and phase of out-plane PFM patterns using DART PFM mode for KNTN41 sample, respectively.

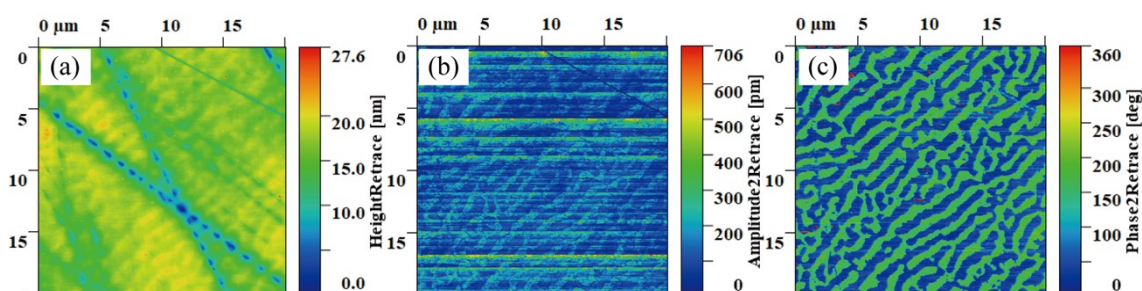

**Figure S2.** (a) (b) (c) The height, amplitude and phase of out-plane PFM patterns using DART PFM mode for KNTN34 sample, respectively.

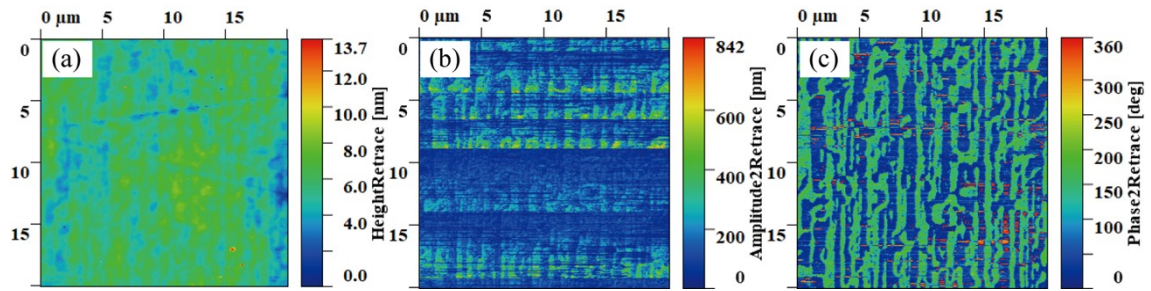

**Figure S3.** (a) (b) (c) The height, amplitude and phase of out-plane PFM patterns using DART PFM mode for KNTN28 sample, respectively.

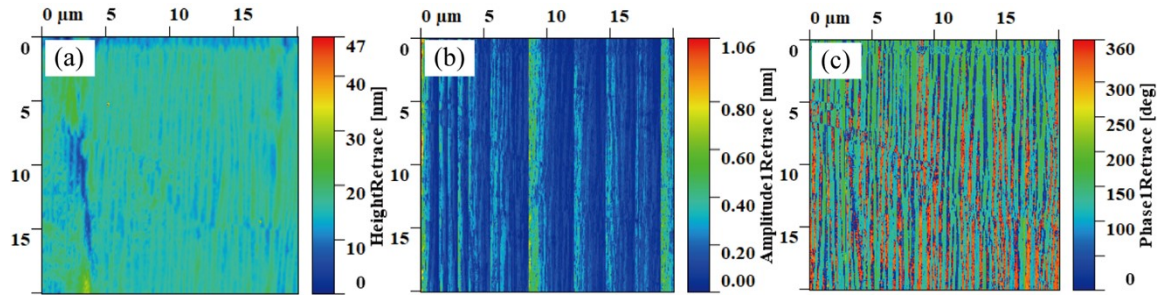

**Figure S4.** (a) (b) (c) The height, amplitude and phase of out-plane PFM patterns of KNTN41 sample after poling under 7.5V for a certain 2  $\mu\text{m}$  region, respectively.

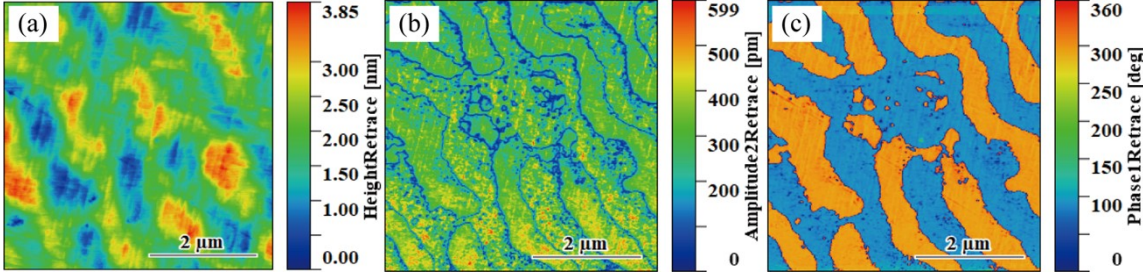

Supplement: d2ce01125e1.pdf [file d2ce01125e1.pdf]
